# Supplementary material for: In situ growth of metallic 1T-WS2 nanoislands on single-walled carbon nanotube films for improved electrochemical performance
Source: Royal Society of Chemistry journal article supplement (doi:10.1039/c6ra19680b), 2016-01-01
Supplement: c6ra19680b1.pdf [file c6ra19680b1.pdf]

## Electronic Supplementary Information

### In-situ growth of metallic 1T-WS<sub>2</sub> nanoislands on single-walled carbon nanotube films for improved electrochemical performance

Qun He<sup>a†</sup>, Weiyu Xu<sup>a†</sup>, Shuangming Chen<sup>a</sup>, Daobin Liu<sup>a</sup>, Muhammad Habib<sup>a</sup>, Qin Liu<sup>a</sup>, Changda Wang<sup>a</sup>, Yasir A. Haleem<sup>a</sup>, Ting Xiang<sup>a</sup>, Chuanqiang Wu<sup>a</sup>, Adnan Khalil<sup>a</sup>, Qi Fang<sup>a</sup>, Zhiqiang Niu<sup>b</sup> and Li Song<sup>a,\*</sup>

<sup>a</sup> National Synchrotron Radiation Laboratory, CAS Center for Excellence in Nanoscience, University of Science and Technology of China, Hefei, Anhui 230029, China

<sup>b</sup> Key Laboratory of Advanced Energy Materials Chemistry (Ministry of Education), College of Chemistry, Collaborative Innovation Center of Chemical Science and Engineering, Tianjin, China

<sup>†</sup>Equally contributed to this work

\* Corresponding Author: song2012@ustc.edu.cn

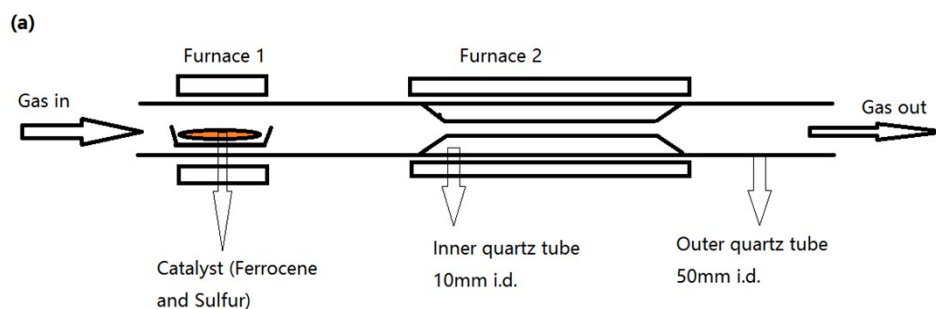

**Scheme S1:** the configuration of synthesis set-up for SWCNT preparation via a floating chemical vapor deposition method.

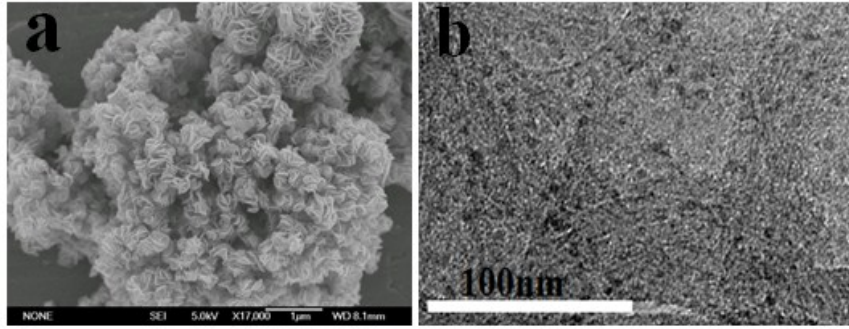

**Fig. S1:** (a) SEM image of pure 1T-WS<sub>2</sub> and (b) low-magnification TEM image of 1T-WS<sub>2</sub>@SWCNT hybrids.

The SEM of pure 1T-WS<sub>2</sub> shows the severe agglomeration. For this, fewer active sites will be exposed to improve its intrinsic HER performance and evidently worse than chemically exfoliated samples<sup>S2,57</sup>, which is consistent with our result showed in Figure 3a. To solve the adverse phenomena, we here use the high-conductive SWCNT as a substrate. Obviously, no glomeration was seen and the thinner and smaller nanoislands dispersed on the surface of SWCNT randomly. Due to this, enhanced electrochemical behavior was achieved in our work.

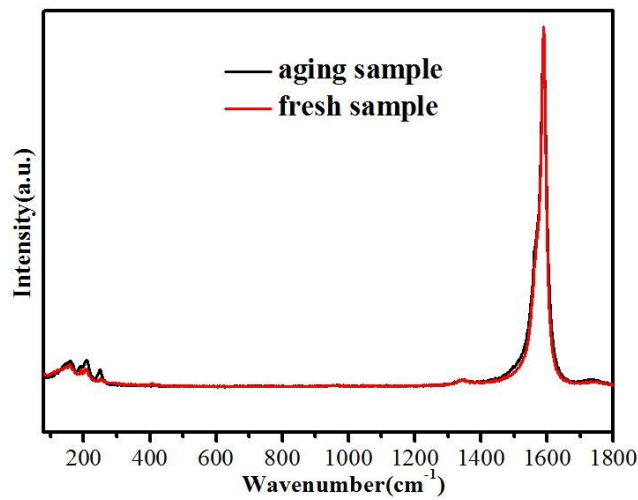

**Fig. S2:** The Raman spectra of 1T-WS<sub>2</sub>@SWCNT hybrids from fresh one (red line) and ten-months aging one (black line), respectively. The Raman spectra of fresh and aging 1T-WS<sub>2</sub>@SWCNT hybrids above showed the similar result, which to some extent indicates the phase stability and the unchanged components.

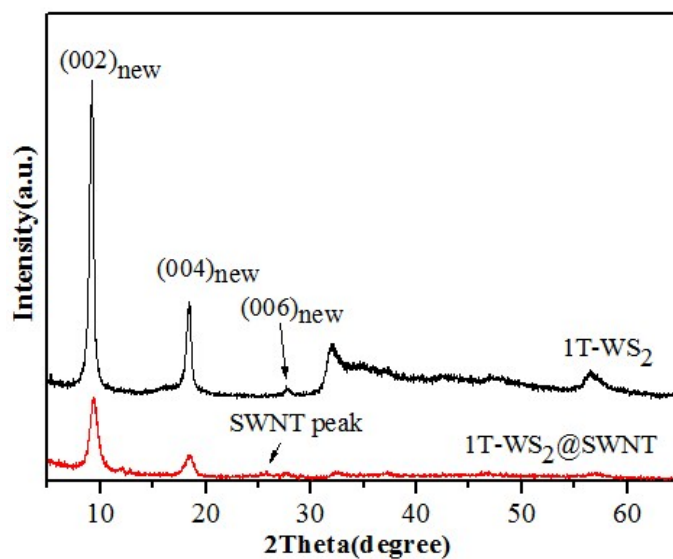

Fig. S3: XRD patterns of 1T-WS<sub>2</sub> (black curve) and 1T-WS<sub>2</sub>@SWCNT (red curve).

The X-ray diffraction (XRD) was utilized to certify the structure and composition. It can be seen that the (002)<sub>new</sub> peak of the 1T-WS<sub>2</sub> samples was found at 9.3°, as well as the corresponding junior diffraction peak (004)<sub>new</sub> and (006)<sub>new</sub> peaks were observed in the range of 16°–30°, and with Bragg formula the calculated S-W-S interlayer spacing is 9.4Å for 1T-WS<sub>2</sub> samples, which is agreed with the result we reported before<sup>S1</sup>, and the relatively intense (00l) reflections reflect the dominant intercalation trait<sup>S2</sup>. To ensure the successful formation of 1T-WS<sub>2</sub> on SWCNT, the XRD for 1T-WS<sub>2</sub>@SWCNT hybrid was also tested, and the main occurred peaks were corresponded with the only 1T-WS<sub>2</sub> and a weak diffraction peak of SWCNT (at ~26.5°) existed as well, which to some extent evidenced that the 1T-WS<sub>2</sub>@SWCNT hybrid is successfully formed in our work.

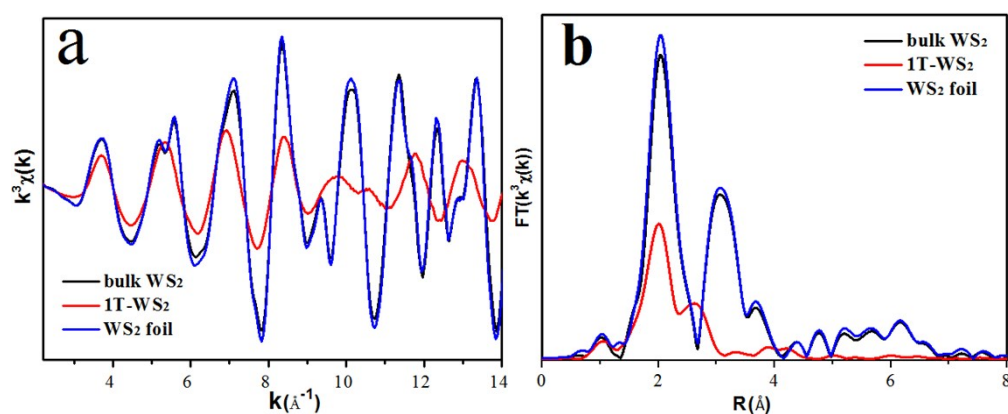

Fig. S4: (a) W L<sub>3</sub>-edge oscillation functions  $\kappa^3\chi(k)$  and (b) the corresponding FT analysis reveals the shortening of W-W bond length in the new 1T-WS<sub>2</sub> contrast with bulk of sample and foil.

The XAFS result of W L<sub>3</sub>-edges in 1T-WS<sub>2</sub> in contrast with bulk WS<sub>2</sub> sample showed in Figure S2a, in which the

oscillation curve of 1T-WS<sub>2</sub> at the k range of 2.2-14.0 Å<sup>-1</sup> is notably different from that of bulk material, suggesting a major transforming in the local atomic arrangements among these two samples. Additionally, the more direct observation of altered atomic arrangements can be seen from the Fourier transform (FT) curves in the real space. Figure S2b reveals that the FT curves of bulk material possesses two main peaks at about 2.41 Å and 3.17 Å, corresponding to the nearest W-S and W-W bond, respectively. Differently, the W-W bond-corresponded peak of 1T-WS<sub>2</sub> and 1T-WS<sub>2</sub>@SWCNT hybrid has the weaker intensity and reduced bond length coordinate ~2.75 Å, in comparison to the bulk one and foil. These observations are close to our HAADF results which we reported previously<sup>S1</sup>.

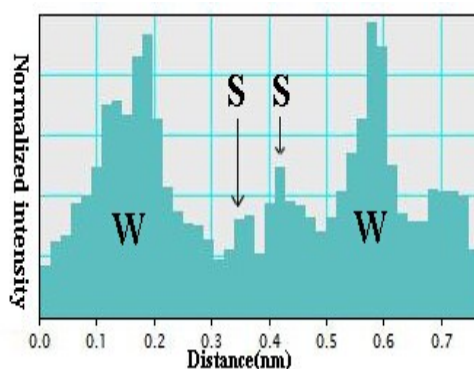

**Fig. S5:** The intensity profile along the red line in Figure 1c. It can be seen that the intense contrast between W and S sites exists, contributed to the reason that S atoms in 1T-WS<sub>2</sub> are uniformly dispersed around W sites.

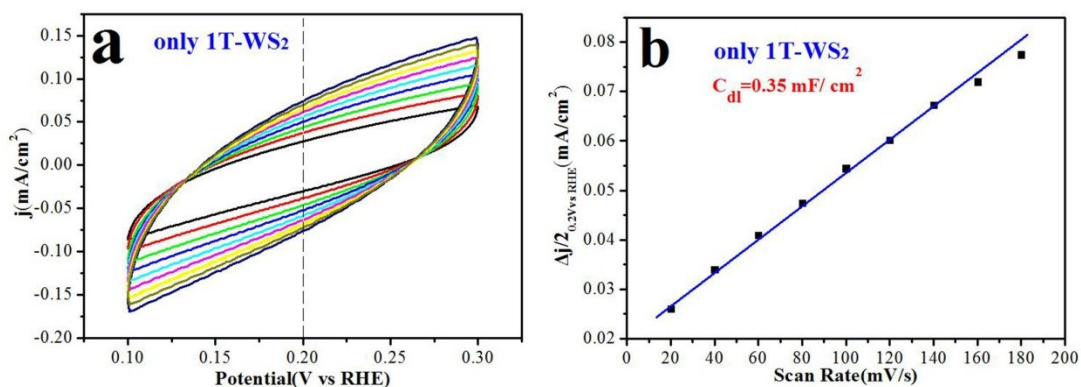

**Fig. S6:** (a) Cyclic voltammograms measurement of 1T-WS<sub>2</sub>@SWCNT hybrid in the region of 0.10-0.30V vs.RHE, in which no faradic process were seen to obtain the capacitive current. (b) The calculated EDLC from (a) at an overpotential of +0.20V vs. RHE. The calculated EDLC value from CV like that of 1T-WS<sub>2</sub>@SWCNT hybrid is very small (~0.35mF/cm<sup>2</sup>), which possibly due to the severe aggregation inducing less exposed surface.

**Table S1:** Structural parameters for W and S atoms in foil, bulk 2H-WS<sub>2</sub> and 1T-WS<sub>2</sub> fitted from EXAFS data, respectively. The structure of 1T-WS<sub>2</sub> is strongly distorted compared to bulk 2H-WS<sub>2</sub>.

| Sample               | Path | R(Å) | N   | $\sigma^2(10^{-3} \text{ \AA}^2)$ |
|----------------------|------|------|-----|-----------------------------------|
| Foil                 | W-S  | 2.41 | 6   | 3.6                               |
|                      | W-W  | 3.17 | 6   | 3.8                               |
| Bulk WS <sub>2</sub> | W-S  | 2.41 | 5.8 | 3.9                               |
|                      | W-W  | 3.17 | 6   | 4.2                               |
| 1T-WS <sub>2</sub>   | W-S  | 2.41 | 4.3 | 8.3                               |
|                      | W-W  | 2.75 | 1.7 | 5.1                               |

R, bond distance; N, coordination number;  $\sigma^2$ , Debye-Waller factor; Error bounds (accuracies) were estimated as R,  $\pm 1\%$ , N,  $\pm 5\%$ ;  $\sigma^2$ ,  $\pm 1\%$ .

**Table S2:** The different EDLC values in several recent literature.

| Reference        | Method                                                                              | State                                     | EDLC                                                      |
|------------------|-------------------------------------------------------------------------------------|-------------------------------------------|-----------------------------------------------------------|
| <b>This work</b> | In-situ solvothermal synthesis                                                      | Nanosheets (NSs)                          | 226mF/cm <sup>2</sup>                                     |
| Ref. S2          | Solvothermal method and plasma-assisted CVD                                         | NSs                                       | 7.96 mF/cm <sup>2</sup>                                   |
| Ref. S3          | hydrothermal method                                                                 | NSs                                       | 21 mF/cm <sup>2</sup>                                     |
| Ref. S4          | High temperature solid reaction and Lithium intercalation                           | Nanotubes (NTs)<br>Nanoribbons-Li(NRs-Li) | 1.27 mF/cm <sup>2</sup><br>6.03 mF/cm <sup>2</sup>        |
| Ref. S5          | Hydrothermal method                                                                 | NSs                                       | 5.8 mF/cm <sup>2</sup>                                    |
| Ref. S6          | Chemically exfoliated from WS <sub>2</sub> nanostructures synthesized by CVD method | As-grown NSs<br>20min microwave NSs       | 2.7 mF/cm <sup>2</sup><br>47.8 mF/cm <sup>2</sup>         |
| Ref. S7          | Low-temperature wet chemical method                                                 | Amorphous layered MoSx                    | 5.11 mF/cm <sup>2</sup>                                   |
| Ref. S8          | Chemical exfoliation                                                                | As-grown NSs<br>n-BuLi treated NSs        | 4.6 $\mu$ F/cm <sup>2</sup><br>75 $\mu$ F/cm <sup>2</sup> |

**Table S3:** The HER performance for various MS<sub>2</sub> (M=W or Mo)-based materials.

| Reference        | Method                                                                                                     | State                        | Overpotentials (mV)        | Tafel Slope (mV/dec)        | Stability | Potential (mV) at j=10mA/cm <sup>2</sup> |
|------------------|------------------------------------------------------------------------------------------------------------|------------------------------|----------------------------|-----------------------------|-----------|------------------------------------------|
| <b>This work</b> | In-situ solvothermal synthesis                                                                             | Nanosheets (NSs)             | 25-30                      | 57                          | Stable    | 108                                      |
| Ref. S2          | Solvothermal method and plasma-assisted CVD                                                                | NSs                          | ~180                       | 41.3                        | Stable    | ~210                                     |
| Ref. S9          | Solvothermal method                                                                                        | NSs                          | ~115                       | 41                          | Stable    | ~150                                     |
| Ref. S3          | Hydrothermal method                                                                                        | NSs                          | ~125                       | 47                          | Stable    | ~180                                     |
| Ref. S11         | Reaction of WO <sub>3</sub> with S at 830 °C by CVD                                                        | NSs                          | ~110                       | ~100                        | Stable    | ~320                                     |
| Ref. S12         | A lithium-based electrochemical anodization and low temperature sulfurization                              | NSs                          | 30                         | 61                          | Stable    | 136                                      |
| Ref. S5          | Hydrothermal method                                                                                        | NSs                          | ~190                       | 73                          | NA        | 229                                      |
| Ref. S4          | High temperature solid reaction and Lithium intercalation                                                  | Nanoribbons, (NRs)<br>NRs-Li | ~140<br>~100               | 77 (S NRs)<br>68 (S NRs-Li) | Stable    | 203<br>173                               |
| Ref. S13         | Solvothermal method                                                                                        | NSs                          | ~170                       | 40.82                       | Stable    | ~215                                     |
| Ref. S6          | Chemically exfoliated from WS <sub>2</sub> nanostructures synthesized by CVD method                        | NSs                          | 75                         | 70                          | NA        | 142                                      |
| Ref. S14         | Solution synthesis with S, WCl <sub>6</sub> , and several organic matters, followed by annealing at 500 °C | Nanoflakes (NFs)             | 100                        | 48                          | Stable    | ~280                                     |
| Ref. S15         | Lithium intercalation and exfoliation from bulk WS <sub>2</sub>                                            | NSs                          | 80-100(1T)<br>150-200 (2H) | ~60 (1T)<br>~115 (2H)       | Stable    | ~260                                     |
| Ref. S16         | Solvothermal method                                                                                        | NSs                          | 140                        | 44.6                        | Stable    | 185                                      |
| Ref. S8          | Chemical exfoliation                                                                                       | NSs                          | ~130                       | 43                          | Stable    | 187                                      |
| Ref. S17         | Hydrothermal synthesis in the presence of RGO nanosheets, then vacuum annealing at 300 °C                  | NSs                          | ~150                       | 58                          | NA        | ~260                                     |
| Ref. S18         | Mechanical activation                                                                                      | NSs-ball-milling NSs         | 60                         | 72                          | Stable    | 150                                      |

|  |  |  |     |     |  |    |
|--|--|--|-----|-----|--|----|
|  |  |  | 120 | 138 |  | NA |
|--|--|--|-----|-----|--|----|

## Reference:

- S1** Q. Liu, X. Li, Z. Xiao, Y. Zhou, H. Chen, K. Adnan, T. Xiang, J. Xu, W. Chu, X. Wu, J. Yang, C. Wang, Y. Xiong, C. Jin, M. A. Pulickel and L. Song, *Adv. Mater.*, 2015, 27, 4837-4844.
- S2** Y. Wang, B. Chen, D. Seo, Z. Han, J. Wong, K. Ostrikov, H. Zhang and H. Yang, *NPG Asia Mater*, 2016, 8, e268.
- S3** Z. Xiang, Z. Zhang, X. Xu, Q. Zhang and C. Yuan, *Carbon*, 2016, 98, 84-89.
- S4** Y. Yang, H. Fei, G. Ruan, Y. Li and M. James, *Adv. Funct. Mater*, 2015, 25, 6077-6083.
- S5** A. S. Tofik, F. Wang, Z. Cheng, X. Zhan, Z. Wang, K. Liu, S. Muhammad, L. Sun and J. He, *Nanoscale*, 2015, 7, 14760-14765.
- S6** M. A. Lukowski, A. S. Daniel, C. R. English, F. Meng, A. Forticaux, R. J. Hamers and S. Jin, *Energy Environ. Sci.*, 2014, 7(8): 2608-2613.
- S7** D. Li, U. Maiti, J. Lim, D. Choi, W. Lee, Y. Oh, G. Lee and S. Kim, *Nano Lett*, 2014, 14, 1228-1233.
- S8** A. L. Mark, S. D. Andrew, F. Meng, F. Audrey, L. Li and S. Jin, *J. Am. Chem. Soc.* 2013, 135, 10274-10277.
- S9** D. Liu, W. Xu, Q. Liu, Q. He, A. Yasir, C. Wang, T. Xiang, C. Zou, W. Chu, J. Zhong, Z. Niu and L. Song, *Nano Res*, 2016, 9, 2079-2087.
- S10** S. Dou, J. Wu, L. Tao, A. Shen, J. Huo and S. Wang, *Nanotech*, 2016, 27, 045402.
- S11** Y. Zhang, J. Shi, G. Han, M. Li, Q. Ji, D. Ma, Y. Zhang, C. Li, X. Lang, Y. Zhang and Z. Liu, *Nano Res*, 2015, 8, 2881-2890.
- S12** Y. Yang, H. Fei, G. Ruan, Y. Li and M. James, *Adv. Funct. Mater*, 2015, 25, 6199-6204.
- S13** Y. Cai, X. Yang, T. Liang, L. Dai, L. Ma, G. Huang, W. Chen, H. Chen, H. Su and M. Xu, *Nanotech*, 2014, 25, 465401.
- S14** L. Cheng, W. Huang, Q. Gong, C. Liu, Z. Liu, Y. Li and H. Dai, *Angew. Chem. Int. Ed.*, 2014, 53, 7860-7863.
- S15** V. Damien, Y. Hisato, J. Li, S. Rafael, C. B. A. Diego, F. Takeshi, M. Chen, A. Tewodros, B. S. Vivek, E. Goki, and C. Manish, *Nat. mater.*, 2013, 12, 850-855.
- S16** Y. Yan, X. Ge, Z. Liu, J. Wang, J. Lee and X. Wang, *Nanoscale*, 2013, 5, 7768-7771.
- S17** Y. Jieun, V. Damien, J. A. Seong, D. Kang, Y. K. Ah, C. Manish and S. S. Hyeon, *Angew. Chem. Int. Ed.*, 2013, 52, 1-5.
- S18** Z. Wu, B. Fang, B. Arman, S. Aokui, P. W. David, D. Wang, *Appl. Catal. B: Environ*, 2012, 125, 59-66.
